# Supplementary material
Source: publisher figshare collection journal article supplement (https://acs.figshare.com/ndownloader/files/8923270)
Supplement: Supplementary file 1 [file 8923270]

# Supporting Information

## For

### An Ursolic Acid-derived Small Molecule Triggers Cancer Cell Death through Hyperstimulation of Macropinocytosis

Lin Sun,<sup>†</sup> Bin Li,<sup>†</sup> Xiaohui Su,<sup>†</sup> Ge Chen,<sup>‡</sup> Yaqin Li,<sup>†</sup> Linqian Yu,<sup>†</sup> Li Li,<sup>\*§</sup> and Wanguo Wei<sup>\*\*‡</sup>

<sup>†</sup>Shanghai Advanced Research institute, Chinese Academy of Sciences, University of Chinese Academy of Sciences, 99 Haik Road, Shanghai, 201210, China

<sup>‡</sup>School of Life Science and Technology, ShanghaiTech University, 100 Haik Road, Shanghai, 201210, China

<sup>§</sup>State Key Laboratory of Oncogenes and Related Genes, Renji-Med X Clinical Stem Cell Research Center, Ren Ji Hospital, School of Biomedical Engineering, Shanghai Jiao Tong University, Shanghai 200127, China

### Table of Contents

|                                                                        |        |
|------------------------------------------------------------------------|--------|
| 1. Structure of ursolic acid (UA) and compound <b>17</b>               | S2     |
| 2. HPLC data on tested compounds and HPLC traces of compound <b>17</b> | S2-S3  |
| 3. Supplemental figures                                                | S4-S6  |
| 4. Copies of NMR data (selected examples)                              | S7-S12 |

## 1. Structure of ursolic acid (UA) and compound 17

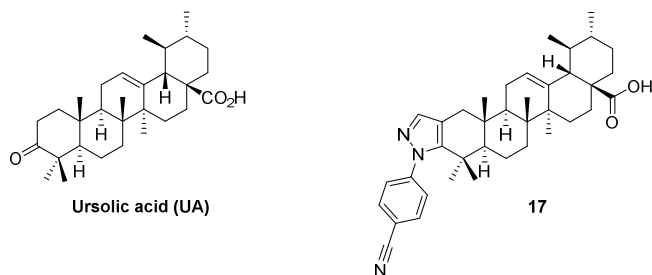

## 2. HPLC data on tested compounds and HPLC traces of compound 17

Analytical HPLC data on tested compounds was confirmed to be >95% (Table 2) as determined by HPLC analysis. HPLC analysis was conducted according to the following method with the retention time expressed in min at UV detection of 210 nm. For HPLC method, an Agilent 1260 series HPLC instrument was used, with chromatography performed on an agilent Eclipse Plus C18 column (100 x 4.6 mm, 3.5  $\mu$ M) with mobile phase gradient of 50-99% CH<sub>3</sub>CN in H<sub>2</sub>O (Table 1), with a flow rate of 1.0 mL/min.

**Table 1.** HPLC conditions

| Time (min) | H <sub>2</sub> O (V%) | CH <sub>3</sub> CN (V%) |
|------------|-----------------------|-------------------------|
| 0          | 50                    | 50                      |
| 25         | 1                     | 99                      |
| 30         | 1                     | 99                      |
| 32         | 50                    | 50                      |

**Table 2.** HPLC purity data on tested compounds

| Compound  | UV (nm) | RT (min) | Purity (%) | Compound  | UV (nm) | RT (min) | Purity (%) |
|-----------|---------|----------|------------|-----------|---------|----------|------------|
| <b>5</b>  | 210     | 12.324   | 95.2%      | <b>18</b> | 210     | 17.272   | 95.6%      |
| <b>6</b>  | 210     | 8.390    | 97.7%      | <b>19</b> | 210     | 20.865   | 98.8%      |
| <b>8</b>  | 210     | 22.810   | 96.2%      | <b>20</b> | 210     | 20.729   | 98.4%      |
| <b>11</b> | 210     | 18.199   | 96.5%      | <b>21</b> | 210     | 20.918   | 97.4%      |
| <b>12</b> | 210     | 5.133    | 95.1%      | <b>22</b> | 210     | 21.732   | 96.2%      |
| <b>17</b> | 210     | 19.003   | 97.5       | <b>23</b> | 210     | 18.981   | 97.1%      |

**Figure 1.** HPLC traces of compound **17**

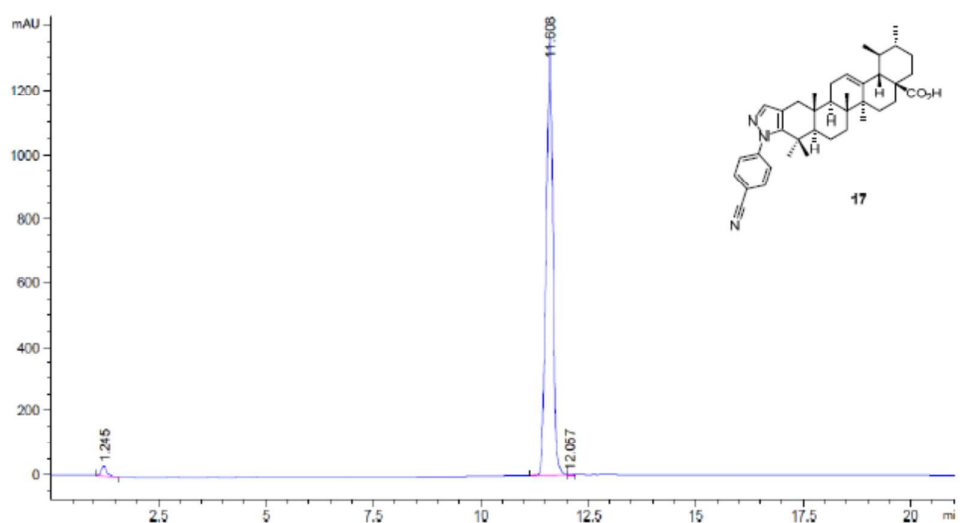

| ----- ----- ----- ----- ----- ----- |        |    |        |           |            |         |
|-------------------------------------|--------|----|--------|-----------|------------|---------|
| 1                                   | 1.245  | VB | 0.1349 | 284.09592 | 29.87693   | 1.9013  |
| 2                                   | 11.608 | BV | 0.1632 | 1.46237e4 | 1362.42847 | 97.8678 |
| 3                                   | 12.057 | VV | 0.1343 | 34.50672  | 3.85880    | 0.2309  |

总量 :                                    1.49423e4    1396.16419

### 3. Supplemental Figures

**Figure S1.** HeLa cells were treated with 20  $\mu$ M UA derivatives for 24 h, followed by imaging with phase-contrast microscopy.

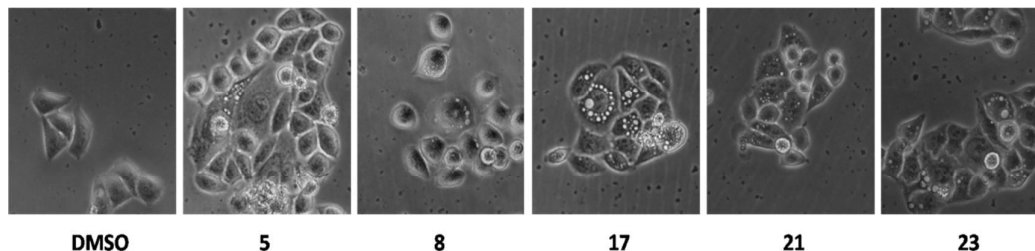

**Figure S2.** Cancer cells were treated with **17** at 20  $\mu$ M for 24 h, 48 h and 72 h, followed by CCK-8 assay.

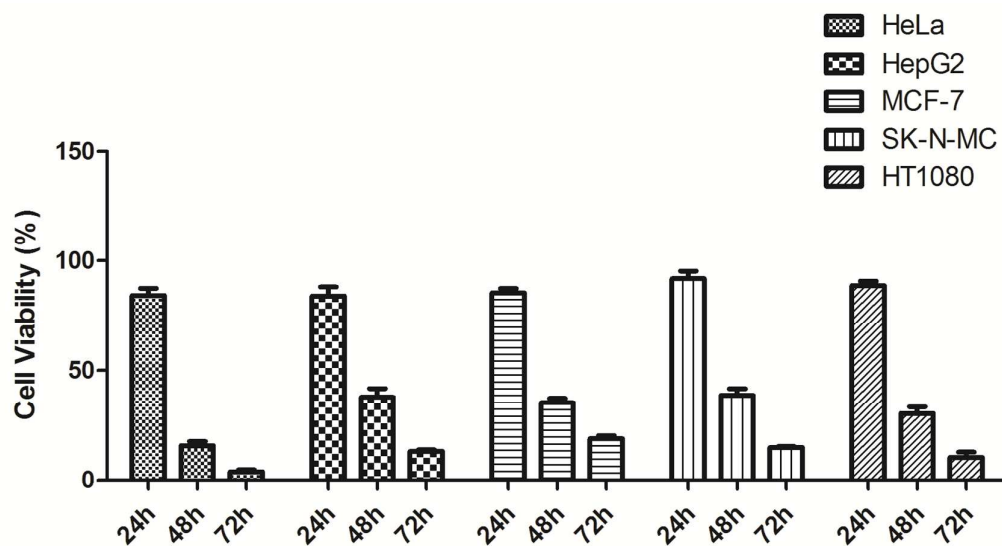

**Figure S3.** HeLa cells were treated with different concentrations of **17** or 0.1% DMSO for 2 days and colony forming assays were performed.

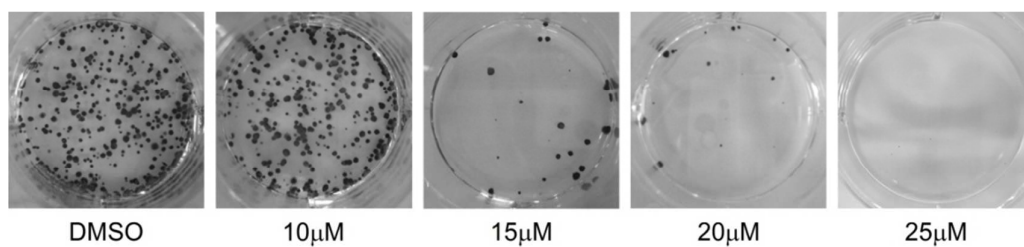

**Figure S4.** HeLa cells were incubated with indicated concentrations of **17** for 24 h or 48 h. The cytotoxicity of **17** was assessed with Alexa Fluor® 488 annexin V/Dead Cell Apoptosis Kit by flow cytometry.

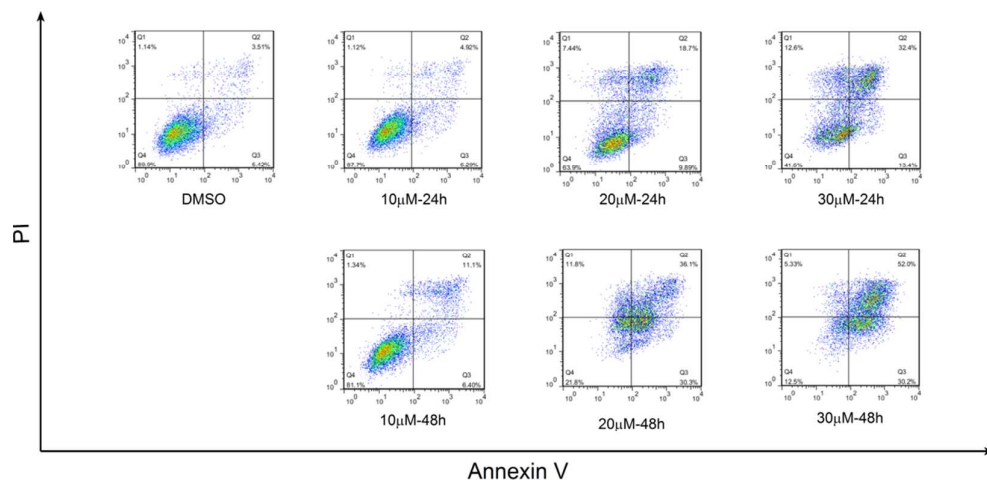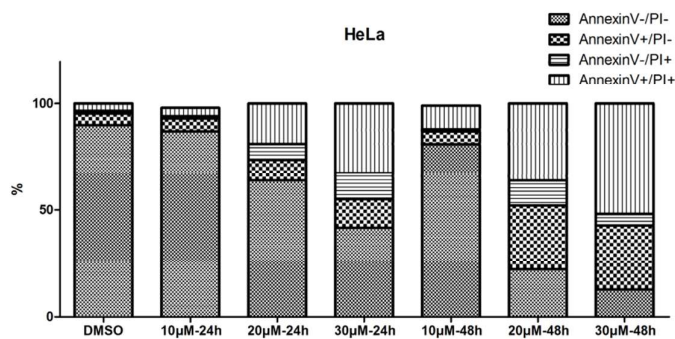

**Figure S5.** Effect of **17** on caspase activation and PARP cleavage. HeLa cells were treated for 24 h or 48 h with the indicated concentration of **17**. The cells were harvested and caspase 3 and PARP expression were determined by western blot.

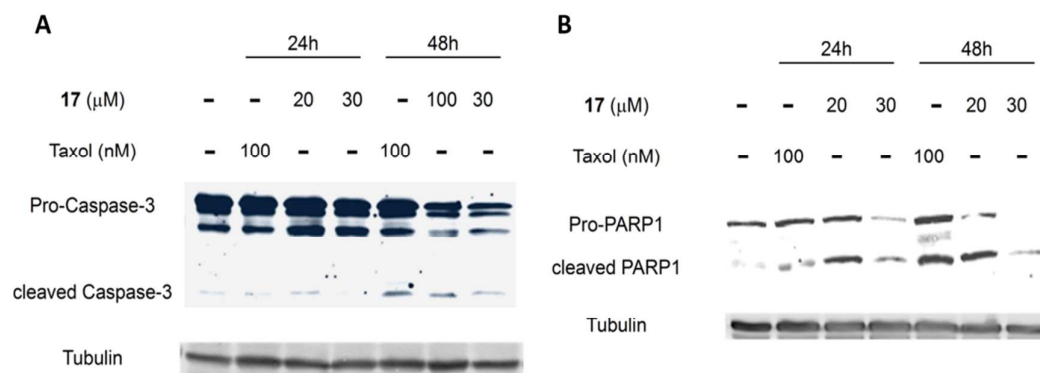

**Figure S6.** HeLa cells were pretreated for 1 h in the presence or absence of indicated inhibitors prior to addition of **17** or DMSO. Phase-contrast images were taken 24 h after addition of **17**.

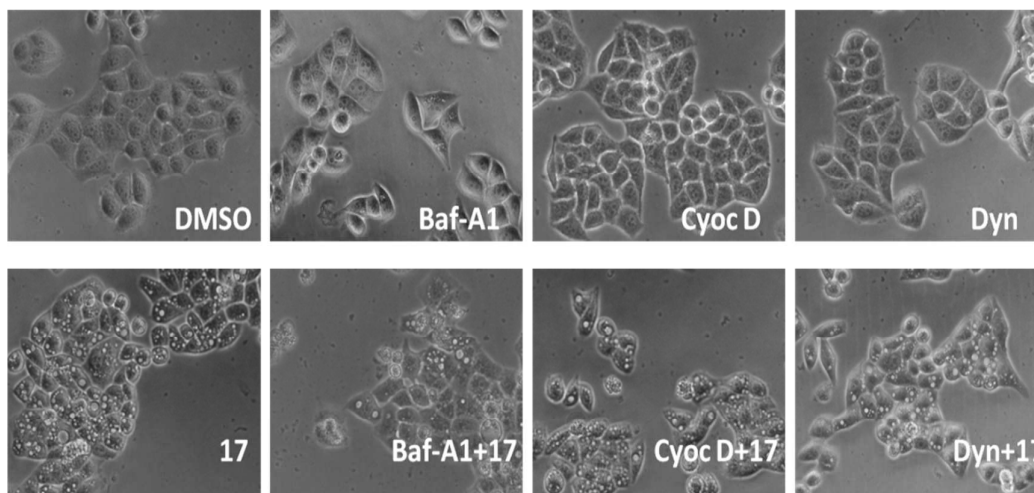

**Figure S7.** HeLa cells were pretreated for 1 h in the presence or absence of indicated inhibitors prior to addition of **17** or DMSO. CCK8 assay was performed 48 h after addition of **17**.

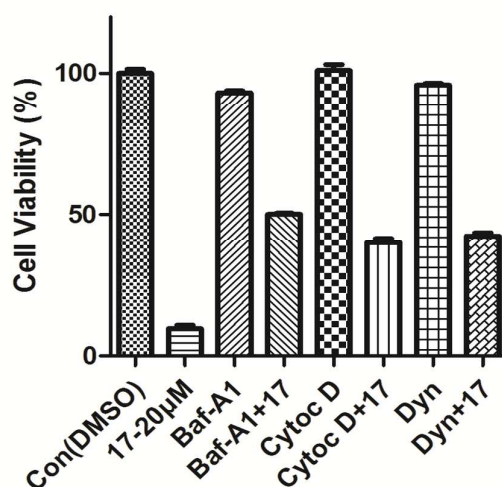

### 3. Copies of NMR Data (*selected examples*)

$^1\text{H}$  NMR Spectrum of **Compound 2** (500 MHz,  $\text{CDCl}_3$ , 25 °C)

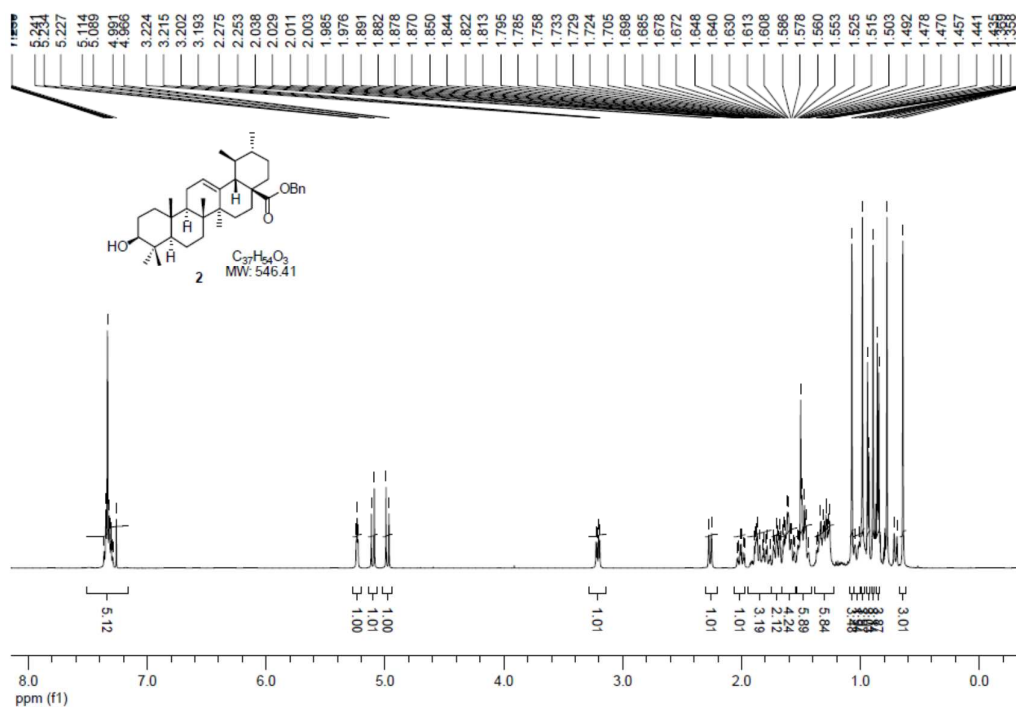

$^{13}\text{C}$  NMR Spectrum of **Compound 2** (125 MHz,  $\text{CDCl}_3$ , 25 °C)

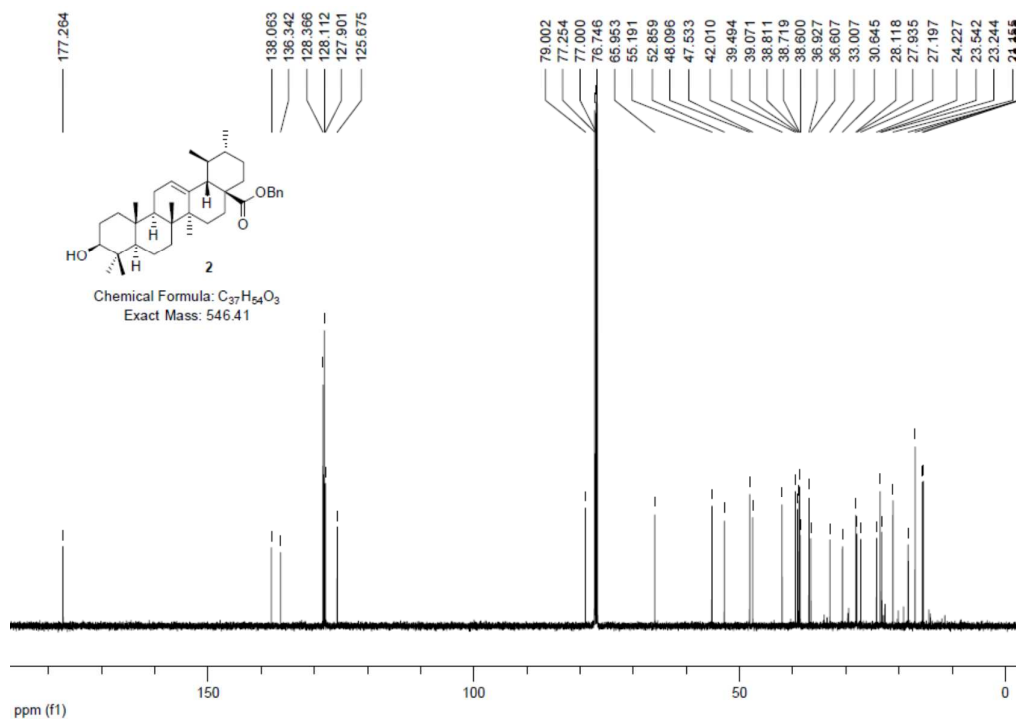

<sup>1</sup>H NMR Spectrum of **Compound 3** (500 MHz, CDCl<sub>3</sub>, 25 °C)

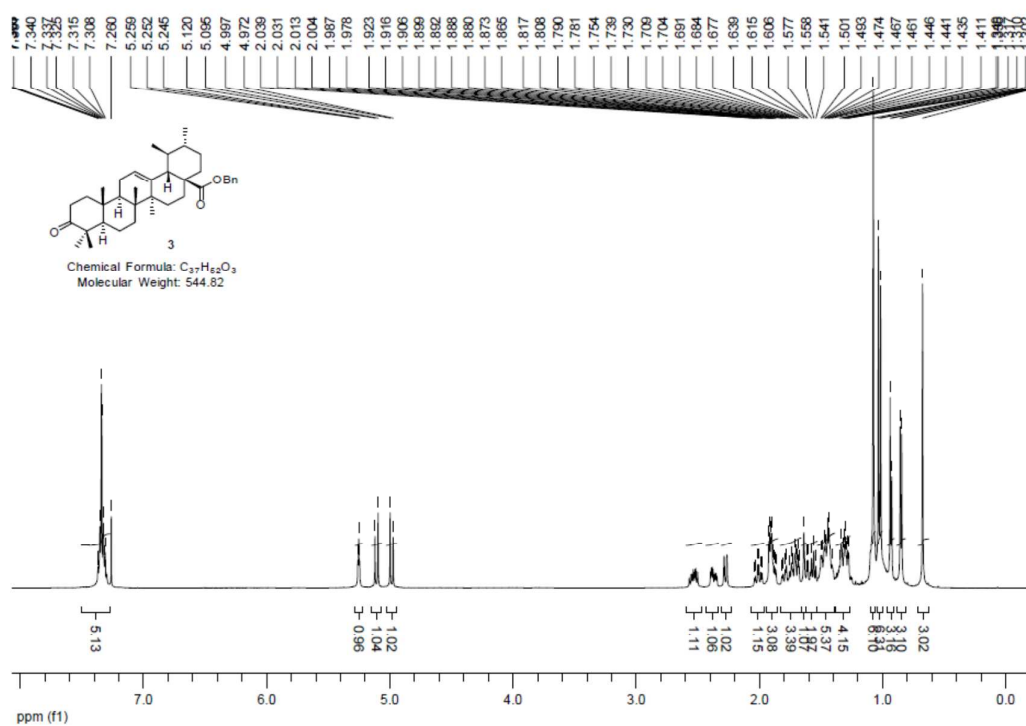

<sup>13</sup>C NMR Spectrum of **Compound 3** (125 MHz, CDCl<sub>3</sub>, 25 °C)

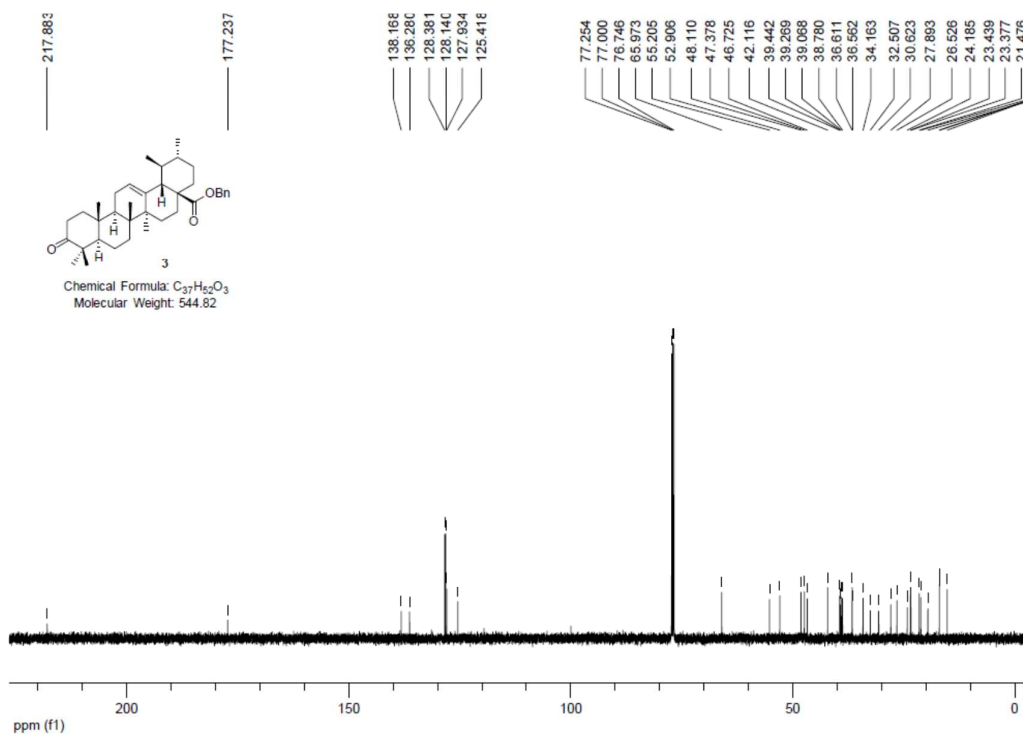



<sup>1</sup>H NMR Spectrum of **Compound 4a** (500 MHz, CDCl<sub>3</sub>, 25 °C)

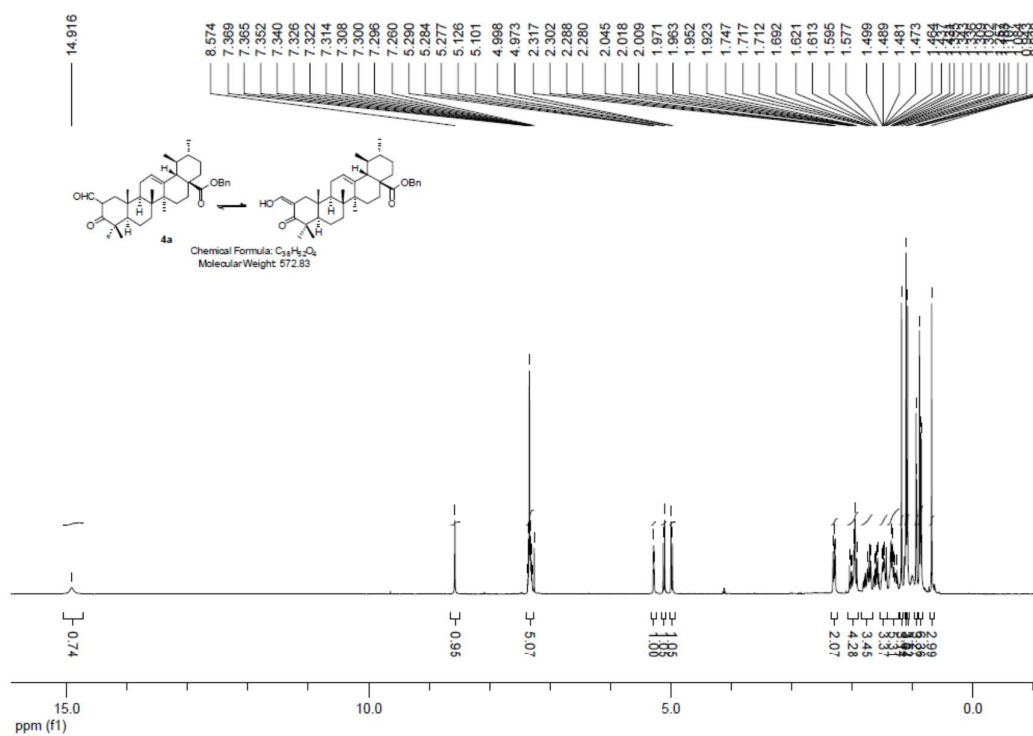

<sup>13</sup>C NMR Spectrum of **Compound 4a** (125 MHz, CDCl<sub>3</sub>, 25 °C)

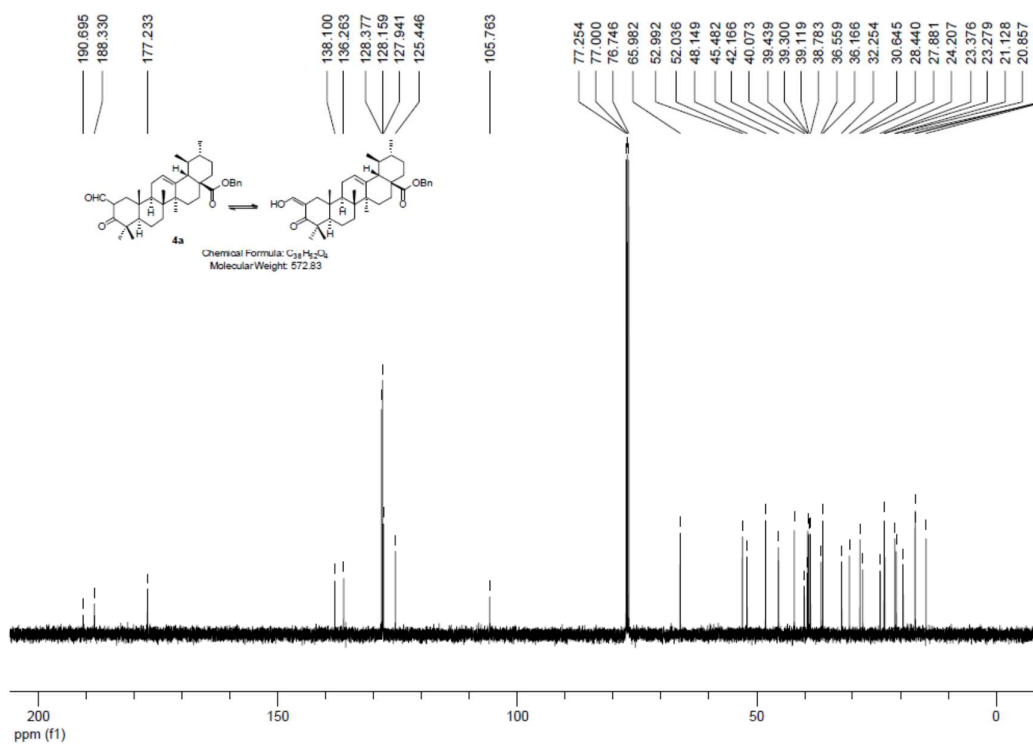

<sup>1</sup>H NMR Spectrum of **Compound 5q** (500 MHz, CDCl<sub>3</sub>, 25 °C)

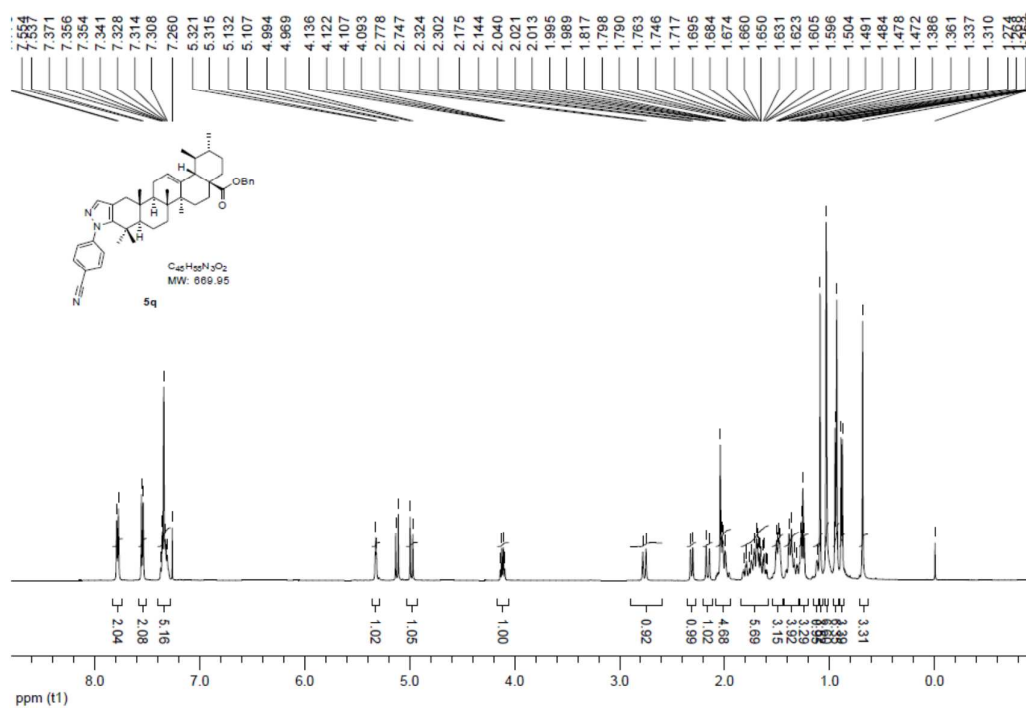

<sup>13</sup>C NMR Spectrum of **Compound 5q** (125 MHz, CDCl<sub>3</sub>, 25 °C)

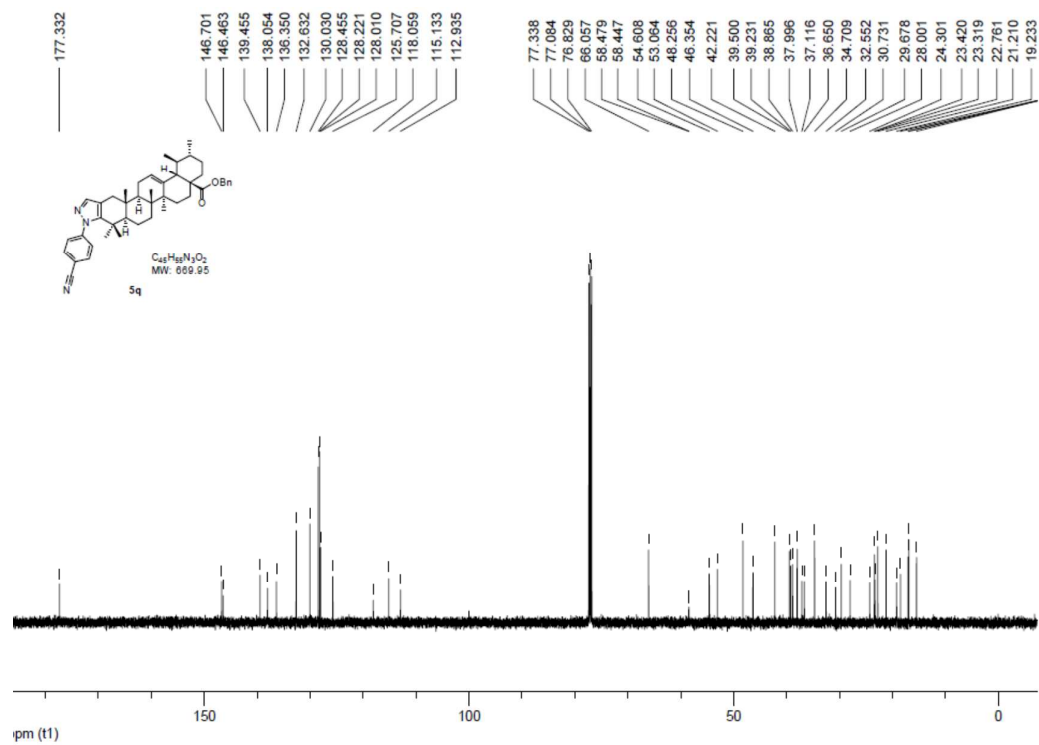

Chemical structure of compound 17: Cc1ccc(C#N)cc1[C@H]2[C@H]3[C@H]4[C@@H]5[C@H]2CC[C@@H]3C[C@H]4[C@@H](C)[C@H]5C(=O)O

$C_{22}H_{29}N_3O_2$   
MW: 387.50

17

$^1H$  NMR spectrum (CDCl<sub>3</sub>) of compound 17. The x-axis represents chemical shift in ppm (t1) from 0.0 to 8.0. The spectrum shows several peaks with integration values below the baseline.

Chemical shift values (ppm): 7.765, 7.748, 7.530, 7.513, 7.372, 7.280, 5.330, 5.323, 5.316, 2.656, 2.626, 2.240, 2.217, 2.156, 2.125, 2.039, 1.904, 1.896, 1.876, 1.868, 1.849, 1.841, 1.743, 1.717, 1.700, 1.695, 1.691, 1.681, 1.673, 1.664, 1.647, 1.530, 1.526, 1.506, 1.484, 1.421, 1.400, 1.395, 1.381, 1.375, 1.350, 1.327, 1.283, 1.269, 1.260, 1.252, 1.244, 1.236, 1.228, 1.220, 1.212, 1.204, 1.196, 1.188, 1.180, 1.172, 1.164, 1.156, 1.148, 1.140, 1.132, 1.124, 1.116, 1.108, 1.100, 1.092, 1.084, 1.076, 1.068, 1.060, 1.052, 1.044, 1.036, 1.028, 1.020, 1.012, 1.004, 0.996, 0.988, 0.980, 0.972, 0.964, 0.956, 0.948, 0.940, 0.932, 0.924, 0.916, 0.908, 0.900, 0.892, 0.884, 0.876, 0.868, 0.860, 0.852, 0.844, 0.836, 0.828, 0.820, 0.812, 0.804, 0.796, 0.788, 0.780, 0.772, 0.764, 0.756, 0.748, 0.740, 0.732, 0.724, 0.716, 0.708, 0.700, 0.692, 0.684, 0.676, 0.668, 0.660, 0.652, 0.644, 0.636, 0.628, 0.620, 0.612, 0.604, 0.596, 0.588, 0.580, 0.572, 0.564, 0.556, 0.548, 0.540, 0.532, 0.524, 0.516, 0.508, 0.500, 0.492, 0.484, 0.476, 0.468, 0.460, 0.452, 0.444, 0.436, 0.428, 0.420, 0.412, 0.404, 0.396, 0.388, 0.380, 0.372, 0.364, 0.356, 0.348, 0.340, 0.332, 0.324, 0.316, 0.308, 0.300, 0.292, 0.284, 0.276, 0.268, 0.260, 0.252, 0.244, 0.236, 0.228, 0.220, 0.212, 0.204, 0.196, 0.188, 0.180, 0.172, 0.164, 0.156, 0.148, 0.140, 0.132, 0.124, 0.116, 0.108, 0.100, 0.092, 0.084, 0.076, 0.068, 0.060, 0.052, 0.044, 0.036, 0.028, 0.020, 0.012, 0.004, 0.000.

Integration values: 2.08, 2.00, 1.01, 1.11, 1.23, 1.38, 1.36, 1.30, 4.74, 3.46, 6.67, 2.68, 2.60, 2.52, 2.44, 2.36, 2.28, 2.20, 2.12, 2.04, 1.96, 1.88, 1.80, 1.72, 1.64, 1.56, 1.48, 1.40, 1.32, 1.24, 1.16, 1.08, 1.00, 0.92, 0.84, 0.76, 0.68, 0.60, 0.52, 0.44, 0.36, 0.28, 0.20, 0.12, 0.04, 0.00.

Chemical structure of compound 17 is shown, with its molecular formula  $C_{26}H_{35}N_3O_2$  and molecular weight (MW): 439.55. The structure is a complex polycyclic molecule featuring a nitrile group, a pyrazole ring, and a ketone group.

The  $^{13}C$  NMR spectrum (CDCl<sub>3</sub>) of compound 17 is displayed below the structure. The spectrum shows peaks corresponding to the carbon atoms in the molecule, with the following chemical shifts (ppm):

| Chemical Shift (ppm) |
|----------------------|
| 183.613              |
| 146.630              |
| 146.197              |
| 139.321              |
| 137.789              |
| 132.523              |
| 129.927              |
| 125.601              |
| 117.908              |
| 115.024              |
| 112.917              |
| 77.254               |
| 77.000               |
| 76.746               |
| 54.447               |
| 52.582               |
| 47.984               |
| 46.288               |
| 42.056               |
| 39.374               |
| 39.054               |
| 38.745               |
| 37.886               |
| 36.971               |
| 36.624               |
| 34.593               |
| 32.342               |
| 30.563               |
| 29.514               |
| 27.912               |
| 24.014               |
| 23.364               |
| 23.235               |
| 22.669               |
| 21.126               |
| 19.106               |

Chemical structure of compound **23** is shown, with molecular formula  $C_{38}H_{49}N_3O_2$  and molecular weight 579.83.

$^1H$  NMR spectrum (CDCl<sub>3</sub>) of compound **23** is displayed, showing peaks from 0.0 to 8.0 ppm. The spectrum includes integration values below the baseline and a list of peak chemical shifts ( $\delta$ ) on the right side.

Chemical structure of compound 23: C38H48N2O2 (MW: 579.83). The structure is a complex polycyclic molecule with a nitrile group and a carboxylic acid group.

<sup>13</sup>C NMR spectrum (ppm (t1)) showing peaks at the following chemical shifts (ppm):

- 181.551
- 148.681
- 143.923
- 139.972
- 139.599
- 135.339
- 134.544
- 134.034
- 131.405
- 126.893
- 118.500
- 116.522
- 114.191
- 55.964
- 54.525
- 49.561
- 49.391
- 49.221
- 49.140
- 49.050
- 48.880
- 48.710
- 48.539
- 47.701
- 43.458
- 40.762
- 40.560
- 40.450
- 39.178
- 38.126
- 38.028
- 35.830
- 33.813
- 33.149
- 31.876
- 30.890
- 30.850
- 30.563
- 30.175
- 29.302
- 25.417
- 24.427
- 24.004
- 23.854
- 23.684
- 23.514
- 23.344
- 23.174
- 23.004
- 22.834
- 22.664
- 22.494
- 22.324
- 22.154
- 21.984
- 21.814
- 21.644
- 21.474
- 21.304
- 21.134
- 20.964
- 20.794
- 20.624
- 20.454
- 20.284
- 20.114
- 19.944
- 19.774
- 19.604
- 19.434
- 19.264
- 19.094
- 18.924
- 18.754
- 18.584
- 18.414
- 18.244
- 18.074
- 17.904
- 17.734
- 17.564
- 17.394
- 17.224
- 17.054
- 16.884
- 16.714
- 16.544
- 16.374
- 16.204
- 16.034
- 15.864
- 15.694
- 15.524
- 15.354
- 15.184
- 15.014
- 14.844
- 14.674
- 14.504
- 14.334
- 14.164
- 13.994
- 13.824
- 13.654
- 13.484
- 13.314
- 13.144
- 12.974
- 12.804
- 12.634
- 12.464
- 12.294
- 12.124
- 11.954
- 11.784
- 11.614
- 11.444
- 11.274
- 11.104
- 10.934
- 10.764
- 10.594
- 10.424
- 10.254
- 10.084
- 9.914
- 9.744
- 9.574
- 9.404
- 9.234
- 9.064
- 8.894
- 8.724
- 8.554
- 8.384
- 8.214
- 8.044
- 7.874
- 7.704
- 7.534
- 7.364
- 7.194
- 7.024
- 6.854
- 6.684
- 6.514
- 6.344
- 6.174
- 6.004
- 5.834
- 5.664
- 5.494
- 5.324
- 5.154
- 4.984
- 4.814
- 4.644
- 4.474
- 4.304
- 4.134
- 3.964
- 3.794
- 3.624
- 3.454
- 3.284
- 3.114
- 2.944
- 2.774
- 2.604
- 2.434
- 2.264
- 2.094
- 1.924
- 1.754
- 1.584
- 1.414
- 1.244
- 1.074
- 1.004
- 0.834
- 0.664
- 0.494
- 0.324
- 0.154
- 0.004
